# Supplementary material for: The Clinical Impact of Metagenomic Next-Generation Sequencing (mNGS) Test in Hospitalized Patients with Suspected Sepsis: A Multicenter Prospective Study.
Source: Research Square preprint supplement (doi:10.21203/rs.3.rs-518512/v1), 2021-05-17
Supplement: Supplementary file 1 [file ccf1a78ec49a8649e3662bd4.docx]

**Additional Table 1**. Univariate linear regression of inflammatory factors level and reads of pathogens in sepsis group.

| Inflammatory factor | P-value | B (95% CI) | R-square |
| --- | --- | --- | --- |
| IL-1β | 0.070 | 0.342(-0.031, 0.714) | 0.171 |
| Eotaxin | 0.019 | 0.519(0.097, 0.941) | 0.259 |
| IFN-α | 0.002 | 2.822(1.209, 4.435) | 0.429 |
| HGF | 0.984 | 0.003(-0.343, 0.349) | 0.000 |
| TNF-α | 0.002 | 0.958(0.419, 1.496) | 0.437 |
| IL-9 | 0.077 | 0.782(-0.095, 1.658) | 0.155 |

Abbreviations: B, standardized linear regression coefficient; IL, interleukin; IFN, interferon; HGF, hepatocyte growth factor; TNF, tumor necrosis factor.
